# Supplementary material
Source: HighWire-hosted journal article supplement (http://asnr-client.stage.highwire.org/highwire/filestream/183500/field_highwire_adjunct_files/0/0985.pdf)

## Online Supplemental Data

Initial Experiences With the Trenz Embolization Device For The Treatment of Wide-Neck Intracranial Aneurysms: A 12 Patient Case-Series

**Case 1:** Unruptured anterior communicating aneurysm (left top image: pre-embolization; right top image: immediate post-embolization; lower left image: control DSA image at 6,8 months).

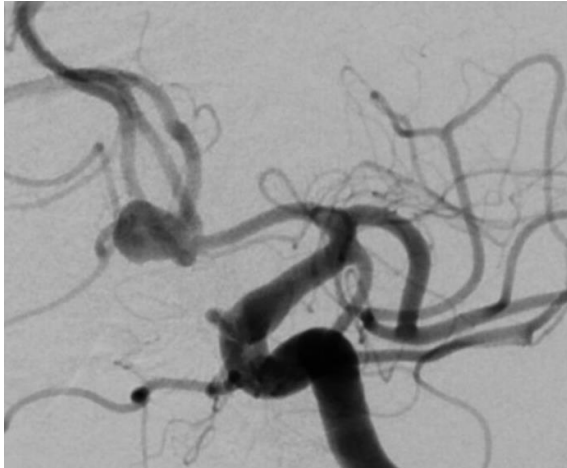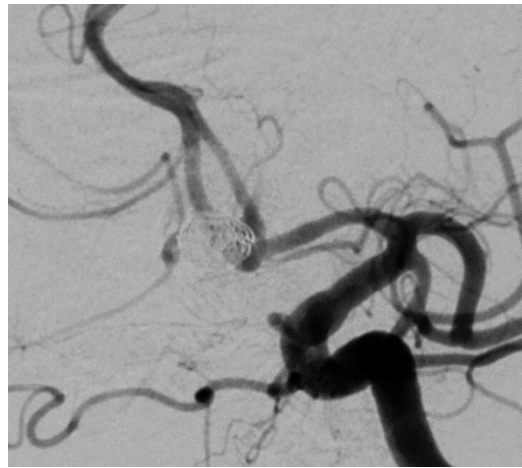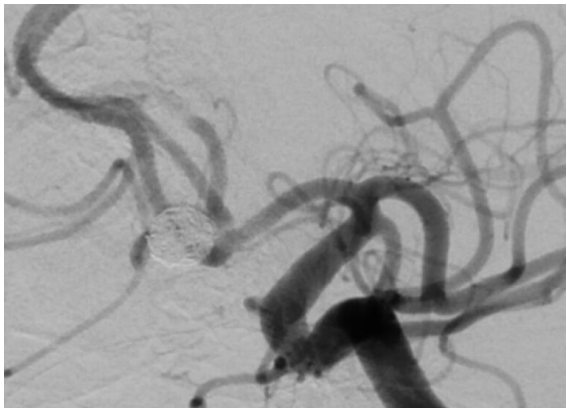

**Case 2:** Unruptured middle cerebral artery bifurcation aneurysm (left top image: pre-embolization; right top image: immediate post-embolization; lower left image: control DSA image at 6.1 months).

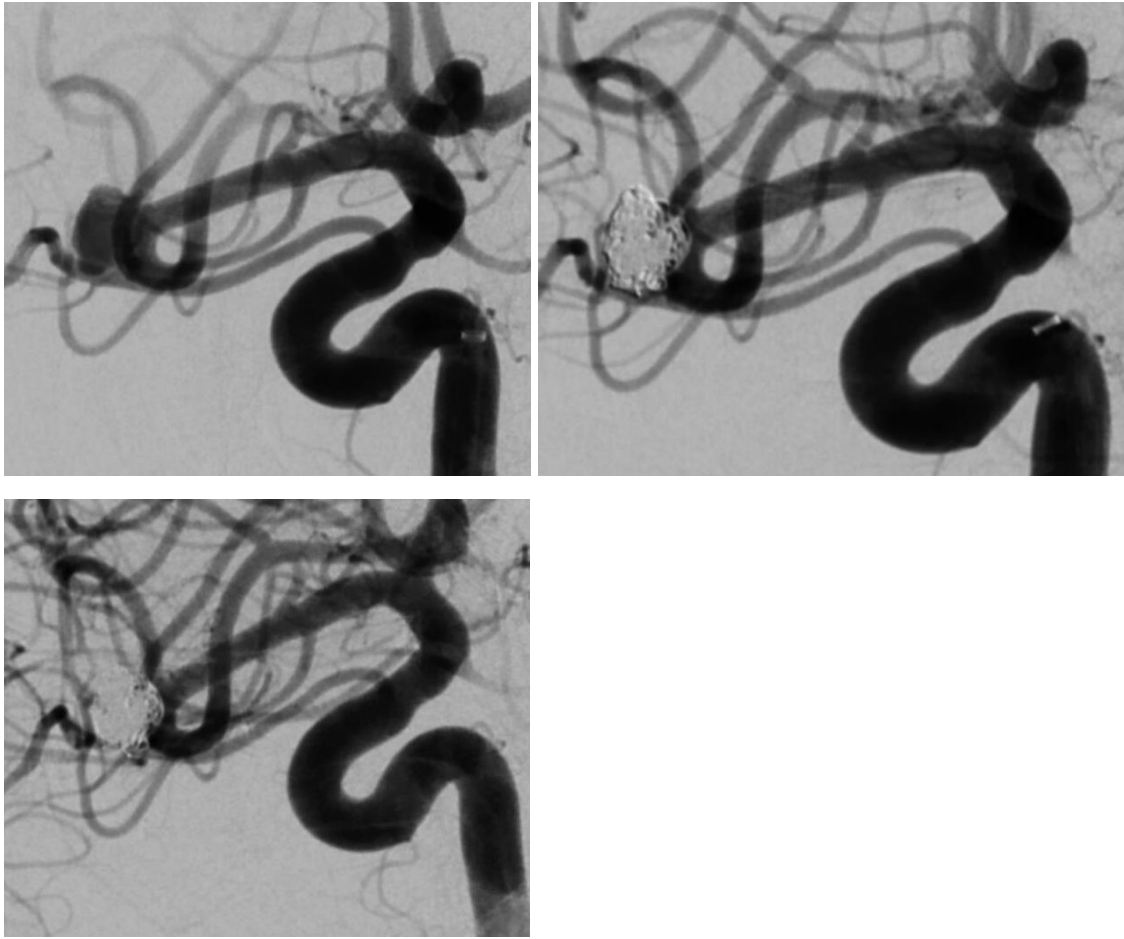

**Case 3:** Unruptured anterior communicating aneurysm (left top image: pre-embolization; right top image: immediate post-embolization; lower left image: control DSA image at 6.3 months).

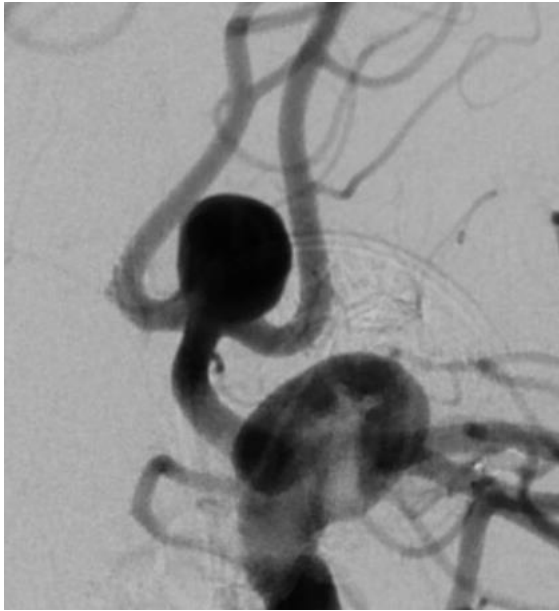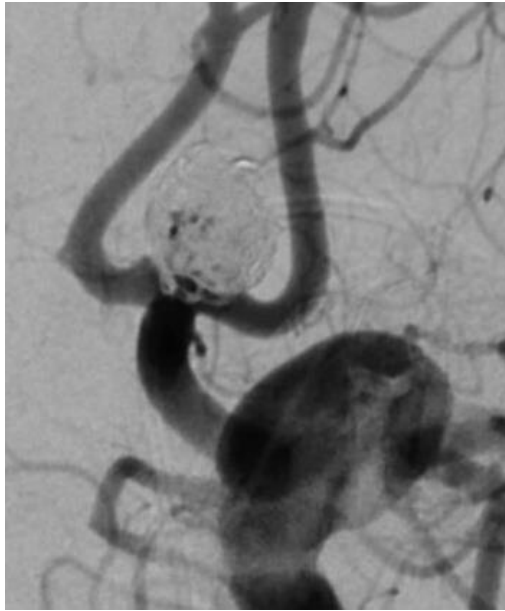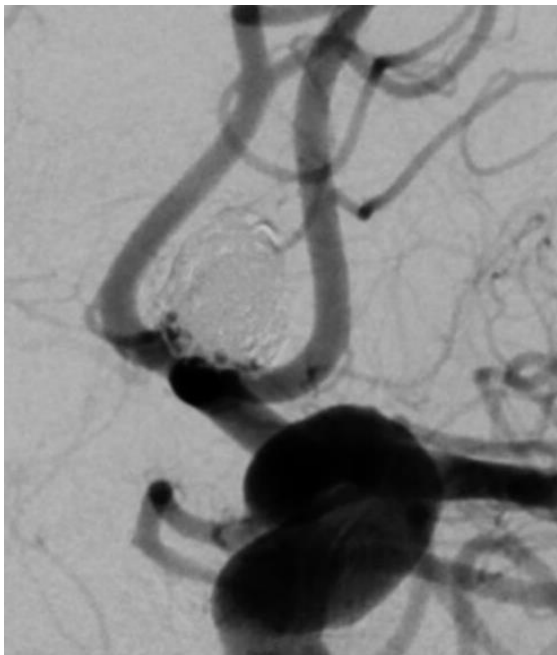

**Case 4:** Unruptured basilar tip aneurysm (left top image: pre-embolization; right top image: immediate post-embolization; lower left image: control DSA image at 7.0 months).

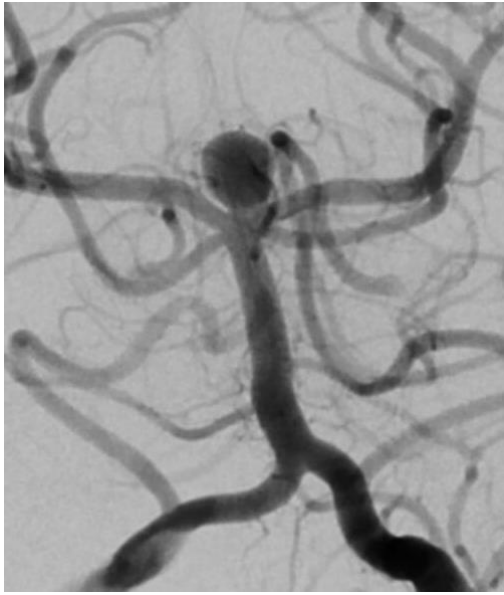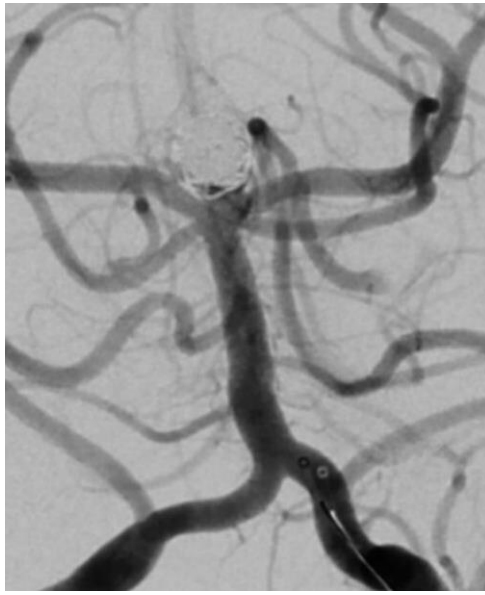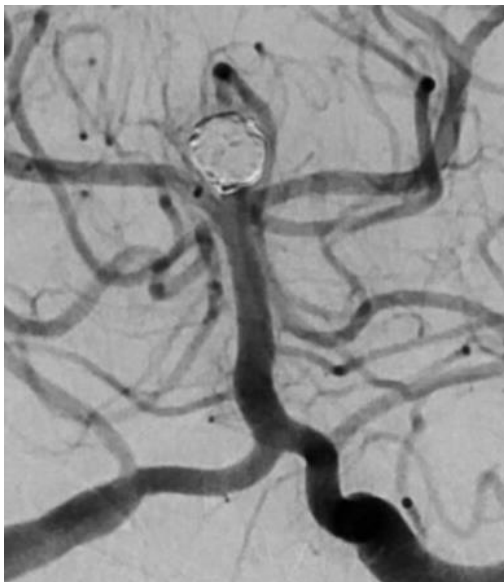

**Case 5:** Unruptured anterior communicating aneurysm (ACoA) (left top image: pre-embolization; right top image: immediate post-embolization; lower left image: immediate post-embolization; lower right image: control DSA image at 7.2 months)

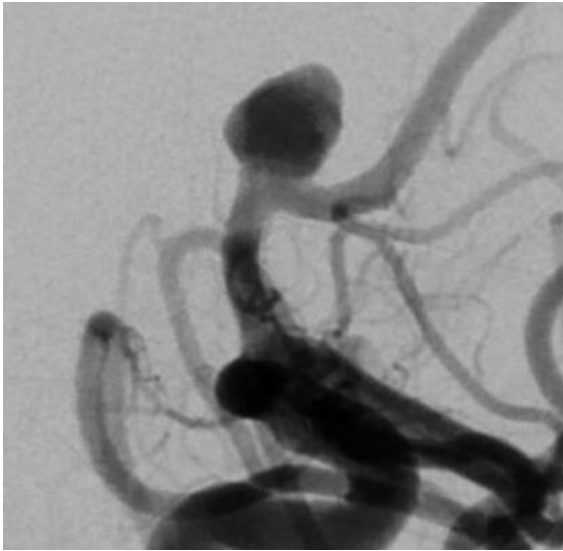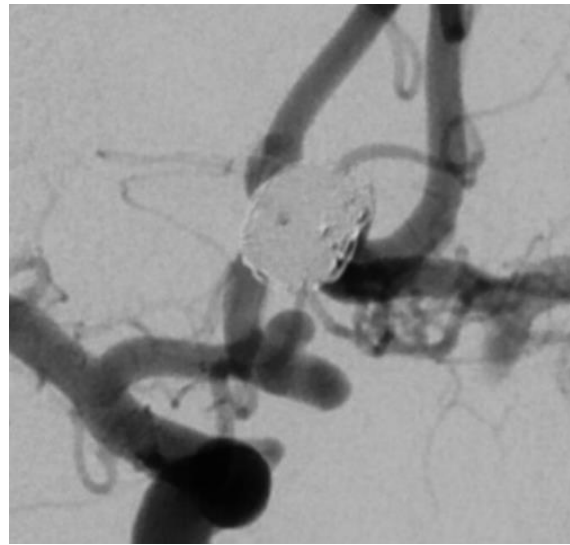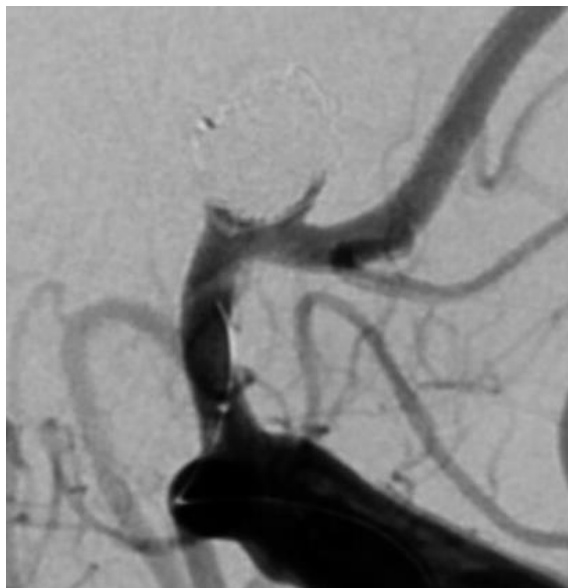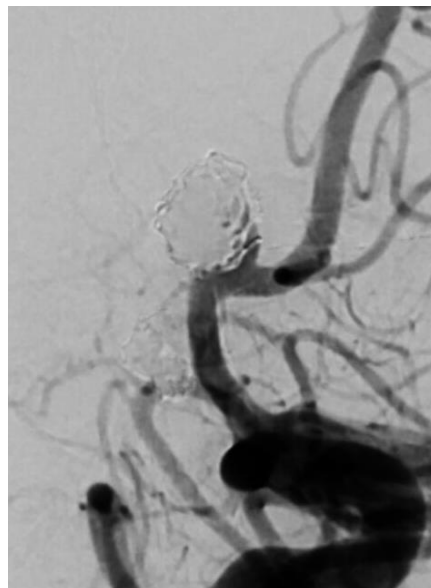

**Case 6:** Unruptured basilar tip aneurysm (left top image: pre-embolization; right top image: immediate post-embolization; lower left image: control DSA image at 6.3 months).

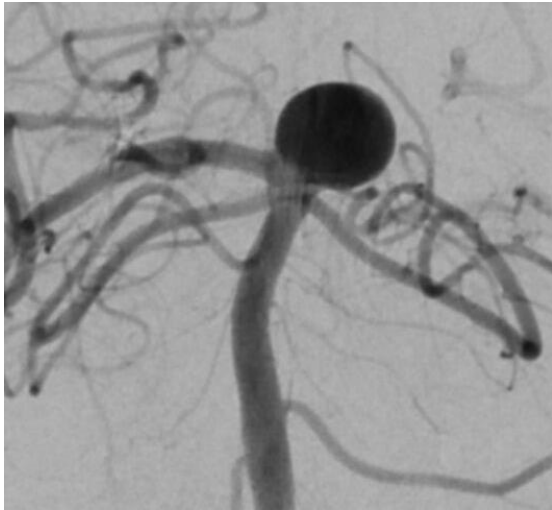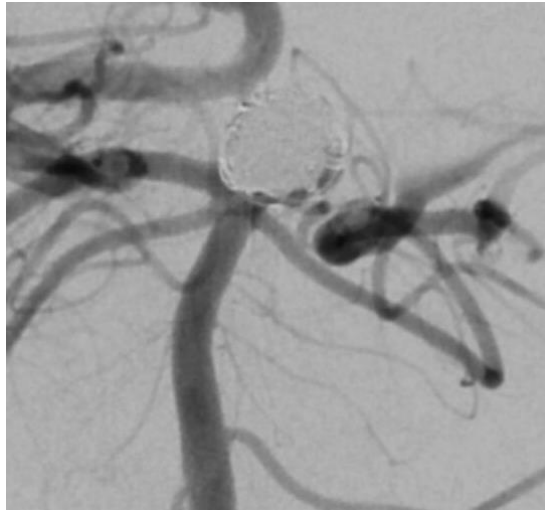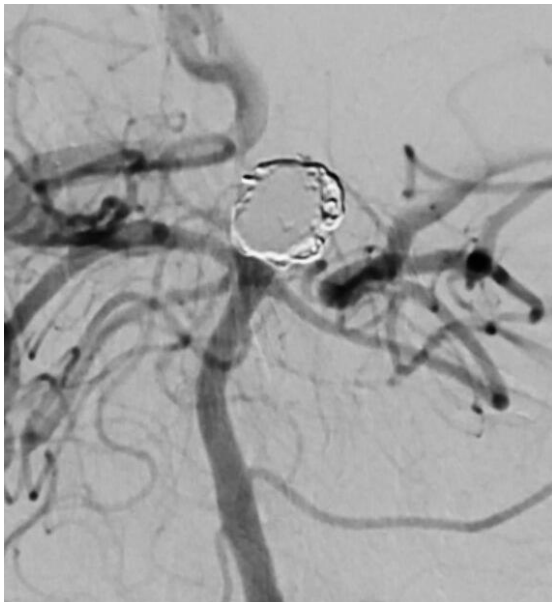

**Case 7:** Unruptured anterior communicating aneurysm (left top image: pre-embolization; right top image: immediate post-embolization; lower left image: control DSA image at 7.0 months).

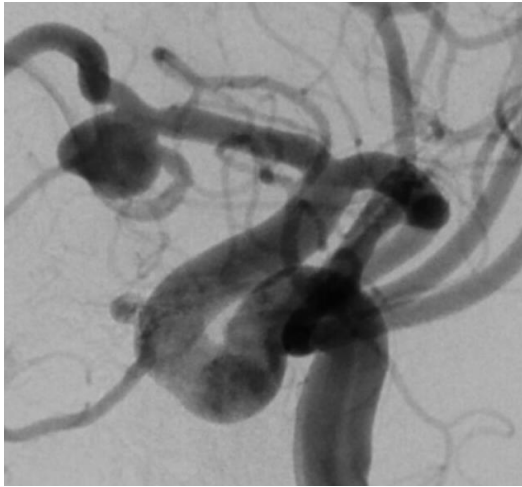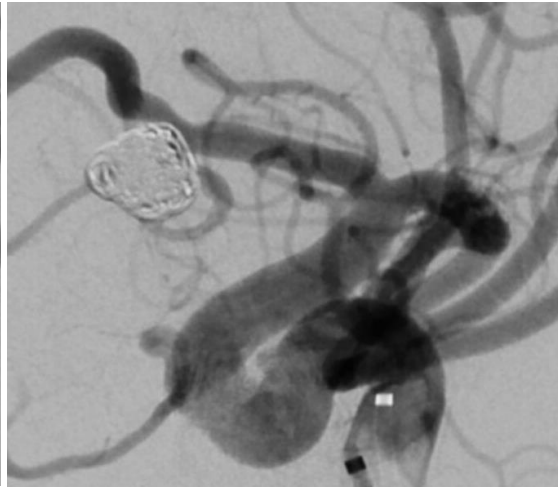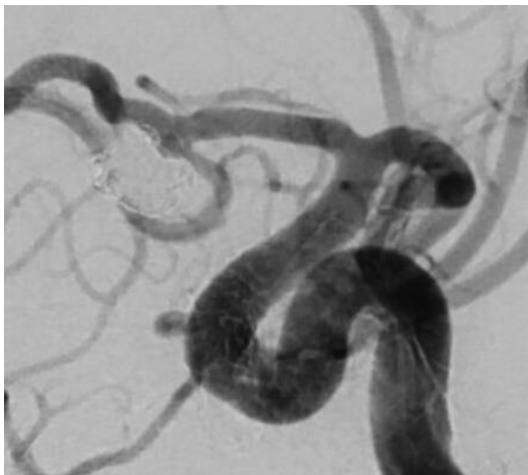

**Case 8:** Unruptured basilar tip aneurysm (left top image: pre-embolization; right top image: immediate post-embolization; lower left image: control DSA image at 6.8 months). The aneurysm was retreated with a by Y-stenting and additional coiling.

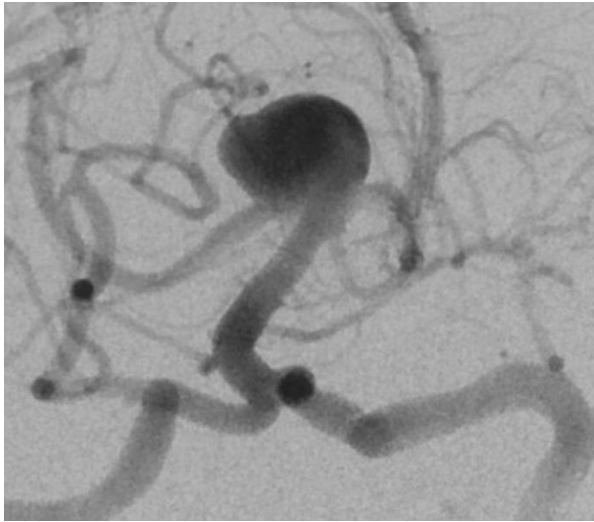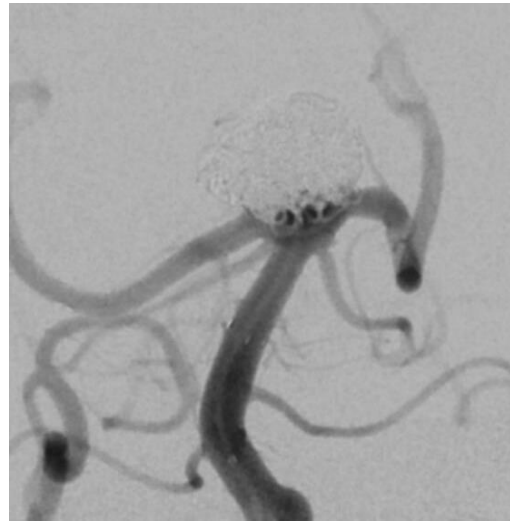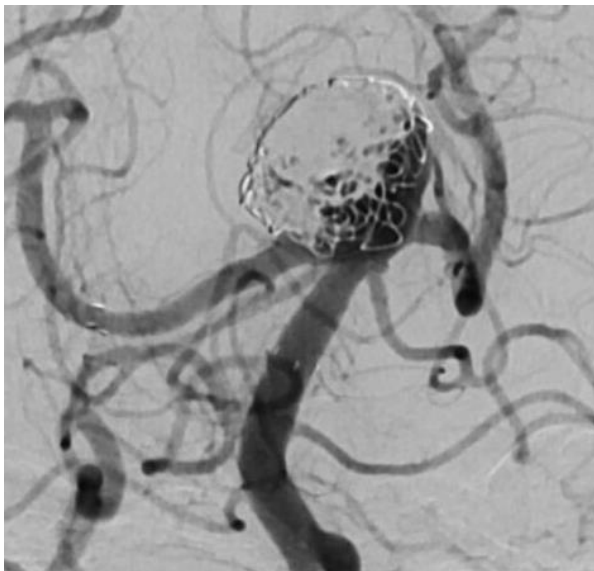



**Case 9:** Unruptured internal carotid artery communicating segment aneurysm (left top image: pre-embolization; right top image: immediate post-embolization; lower left image: DSA image immediately following the hemorrhage 1.6 months after the index treatment [the red arrow]). The aneurysm was retreated with three flow diverter stents, but the patient deceased after the intervention.

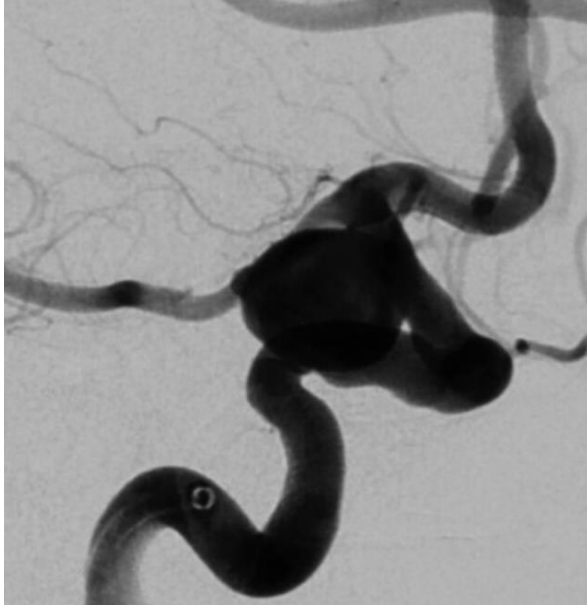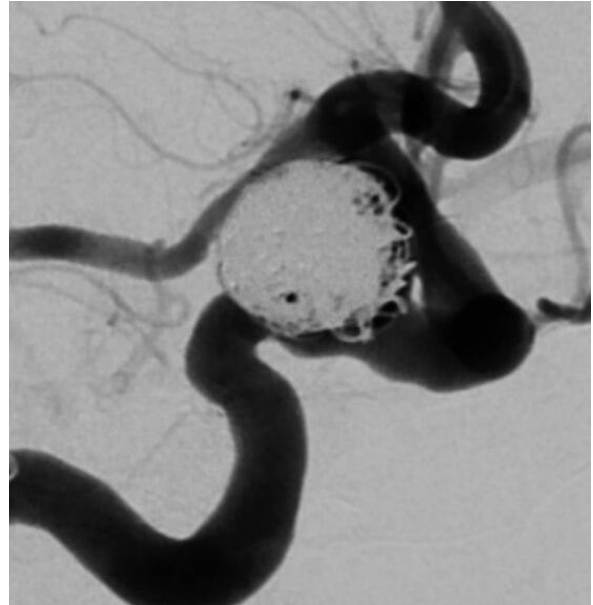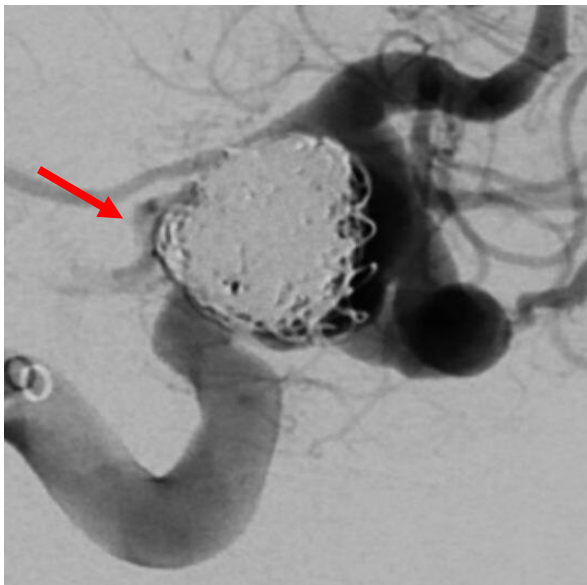

**Case 10:** Unruptured basilar tip aneurysm (left top image: pre-embolization; right top image: immediate post-embolization; lower left image: control DSA image at 6.4 months).

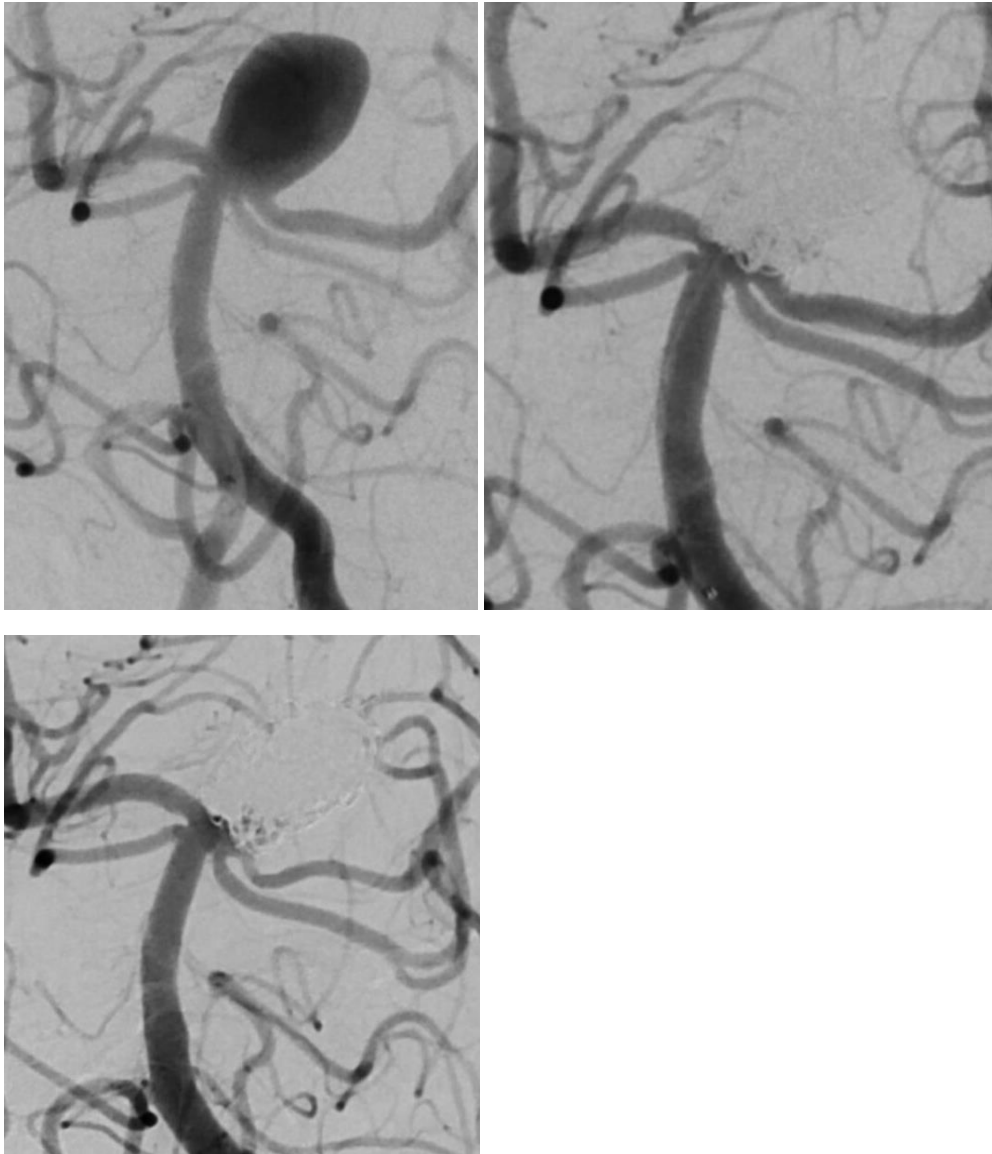

**Case 11:** Ruptured internal carotid artery communicating segment aneurysm (left top image: pre-embolization; right top image: immediate post-embolization; lower left image: control DSA image at 4.2 months).

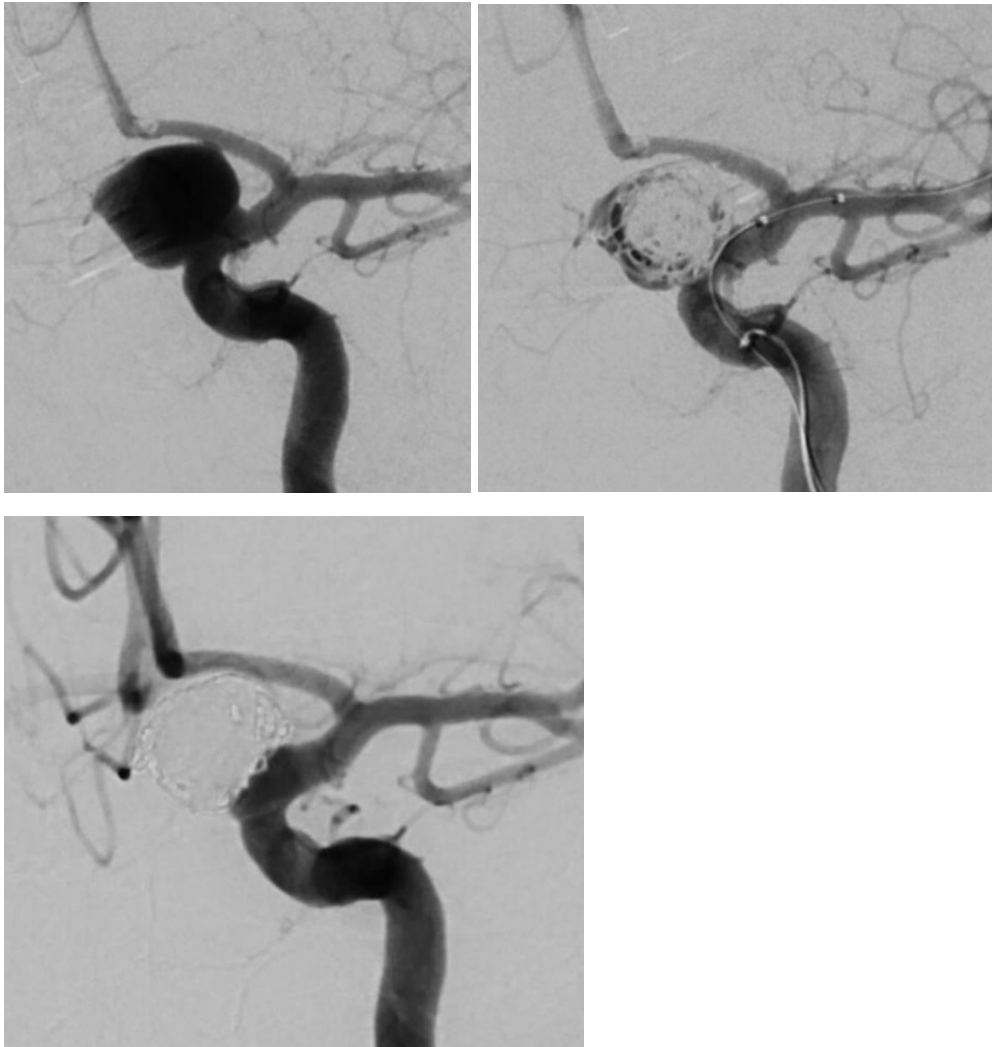

**Case 12:** Ruptured internal carotid artery communicating segment aneurysm (left top image: pre-embolization; right top image: immediate post-embolization; lower left image: control DSA image at 6.6 months).

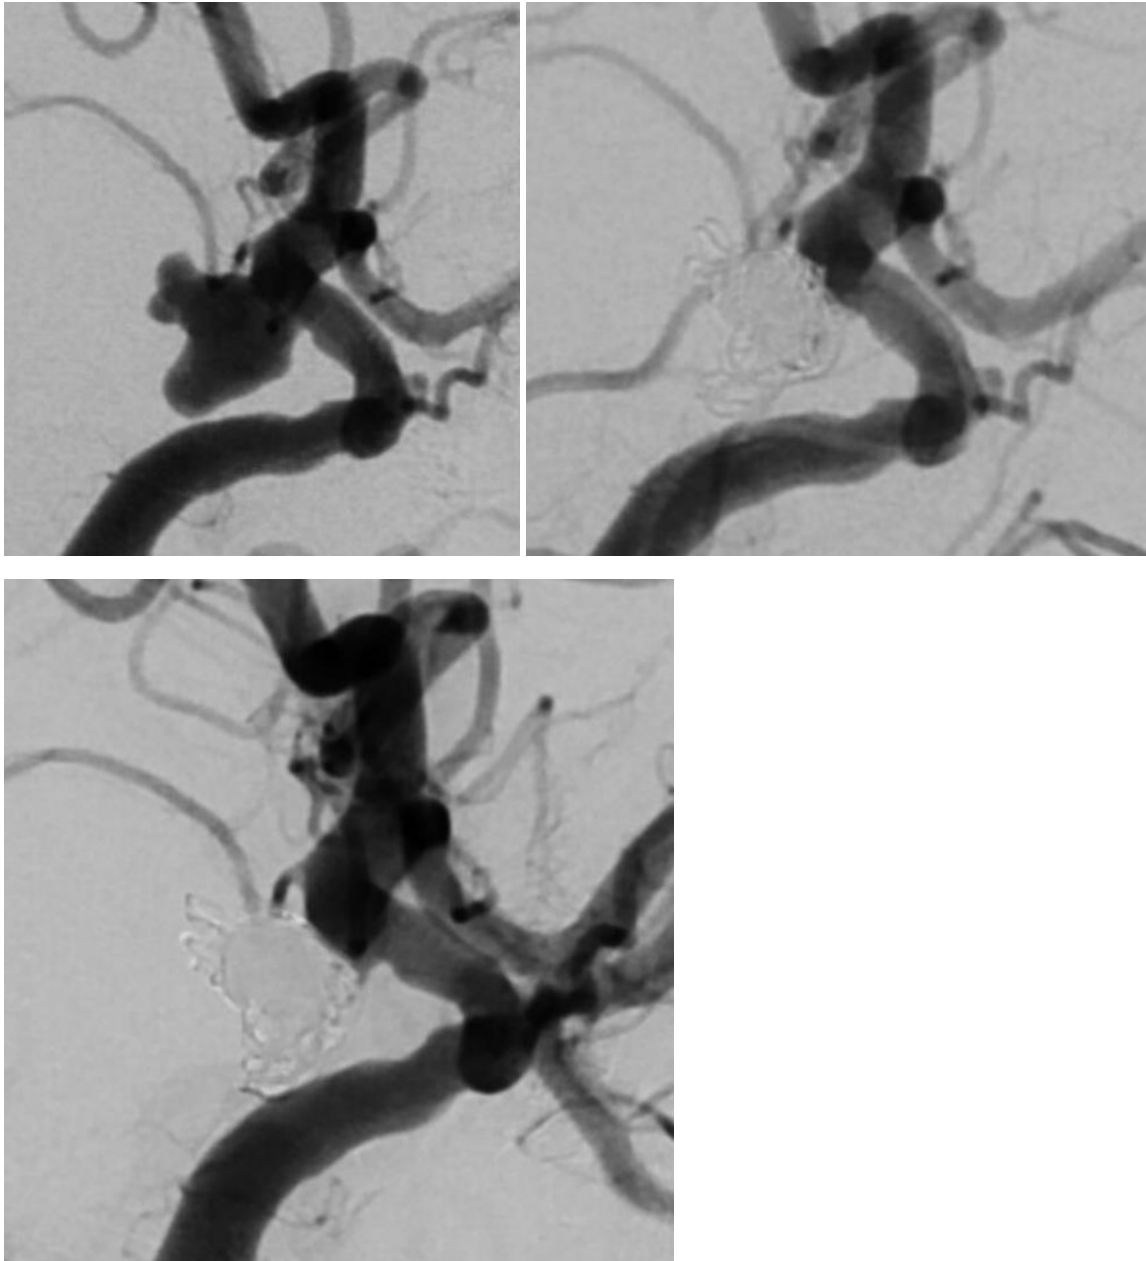

Supplement: 0985.pdf [file 0985.pdf]
